# Supplementary material for: Bi-functional heterogeneous catalysts for carbon dioxide conversion: enhanced performances at low temperature
Source: Royal Society of Chemistry journal article supplement (doi:10.1039/c8ra03878c), 2018-01-01
Supplement: c8ra03878c1.pdf [file c8ra03878c1.pdf]

# Supporting information

Bi-functional heterogeneous catalysts for carbon dioxide conversion: enhanced performances at low temperature

Adrien Comès, Xavier Collard, Luca Fusaro, Luciano Atzori, M. Giorgia Cutrufello and Carmela Aprile \*

## **Contents :**

1. TEM images of XS-MCM-41 (a), XS-Sn (b) and XS-Zn (c) **S1**
2. Small angle XRD pattern XS-MCM-41, XS-MCM-41-Imi, XS-Sn, XS-Sn-Imi, XS-Zn and XS-Zn-Imi **S2**
3. N<sub>2</sub> ads-des and pore size distribution of XS-MCM-41, XS-Sn and XS-Zn **S3**
4. <sup>13</sup>C- and <sup>29</sup>Si-CPMAS-NMR of XS-MCM-41-Imi and XS-Zn-Imi **S4**
5. N<sub>2</sub> ads-des and pore size distribution of XS-MCM-41 and XS-MCM-41-Imi **S5**

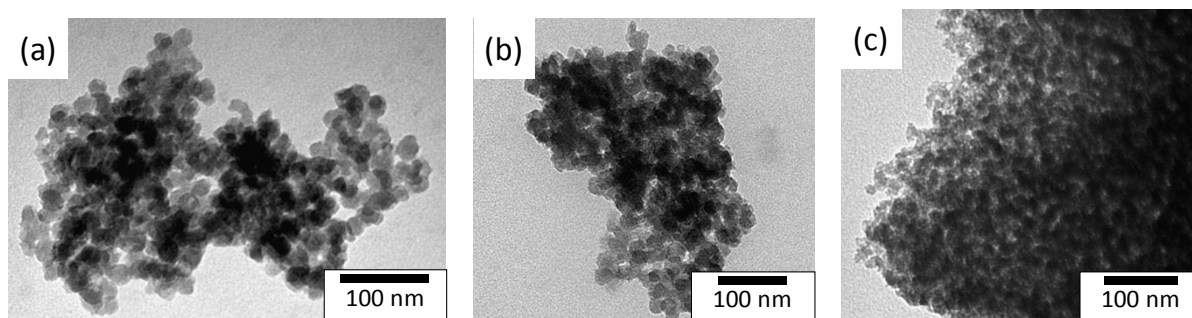

**S1** : TEM images of XS-MCM-41 (a), XS-Sn (b) and XS-Zn (c)

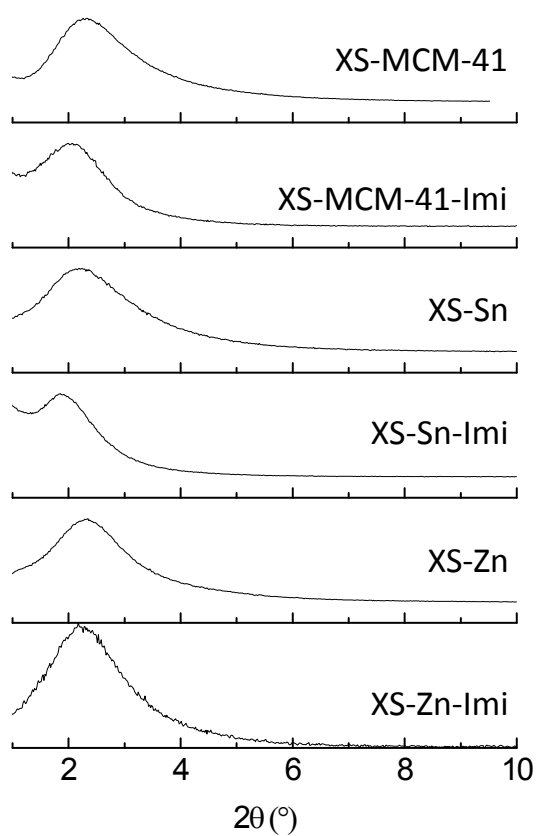

**S2** Small angle XRD pattern of XS-MCM-41, XS-MCM-41-Imi, XS-Sn, XS-Sn-Imi, XS-Zn and XS-Zn-Imi

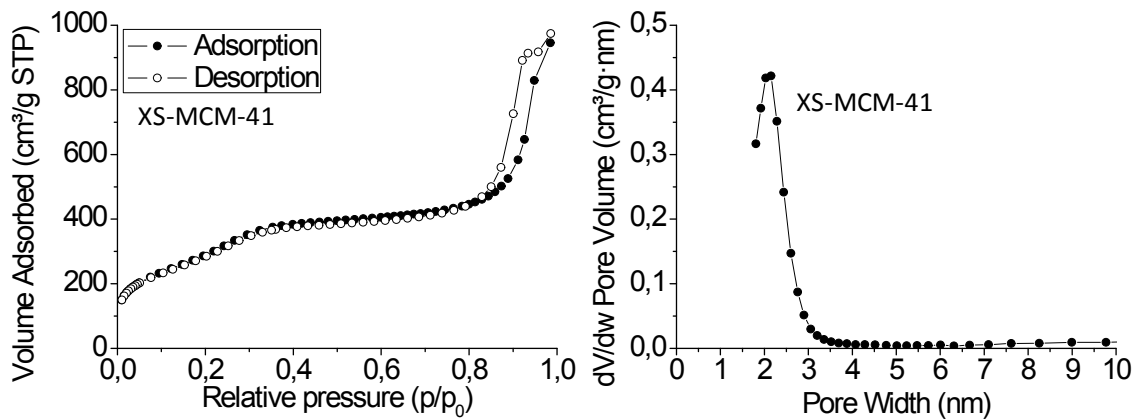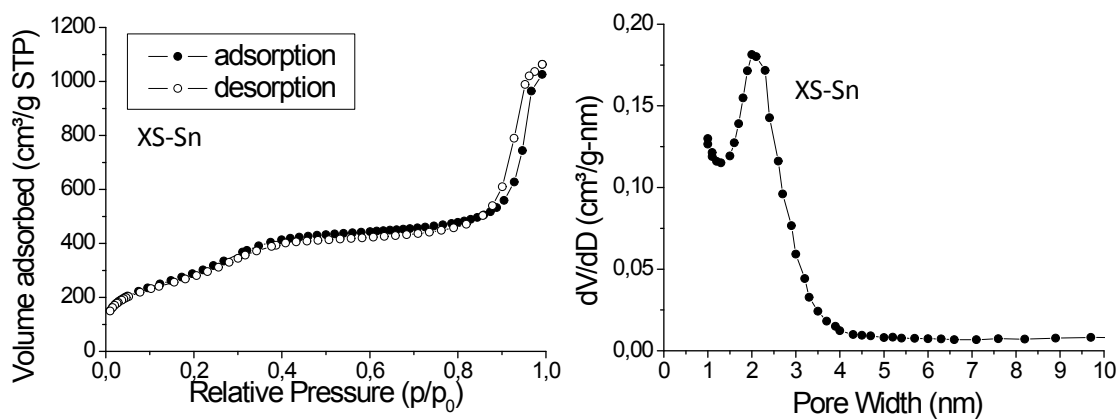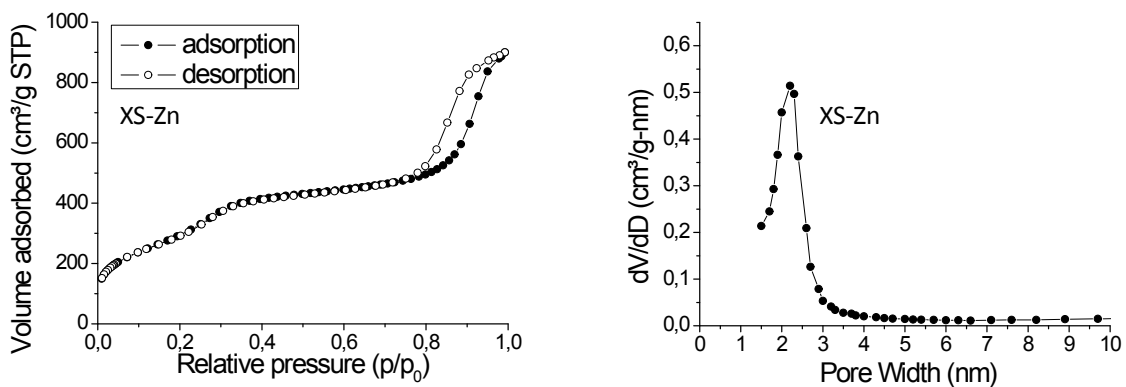

**S3** N<sub>2</sub> adsorption-desorption isotherm of XS-MCM-41, XS-Sn and XS-Zn and the corresponding pore size distribution determined via BJH method.

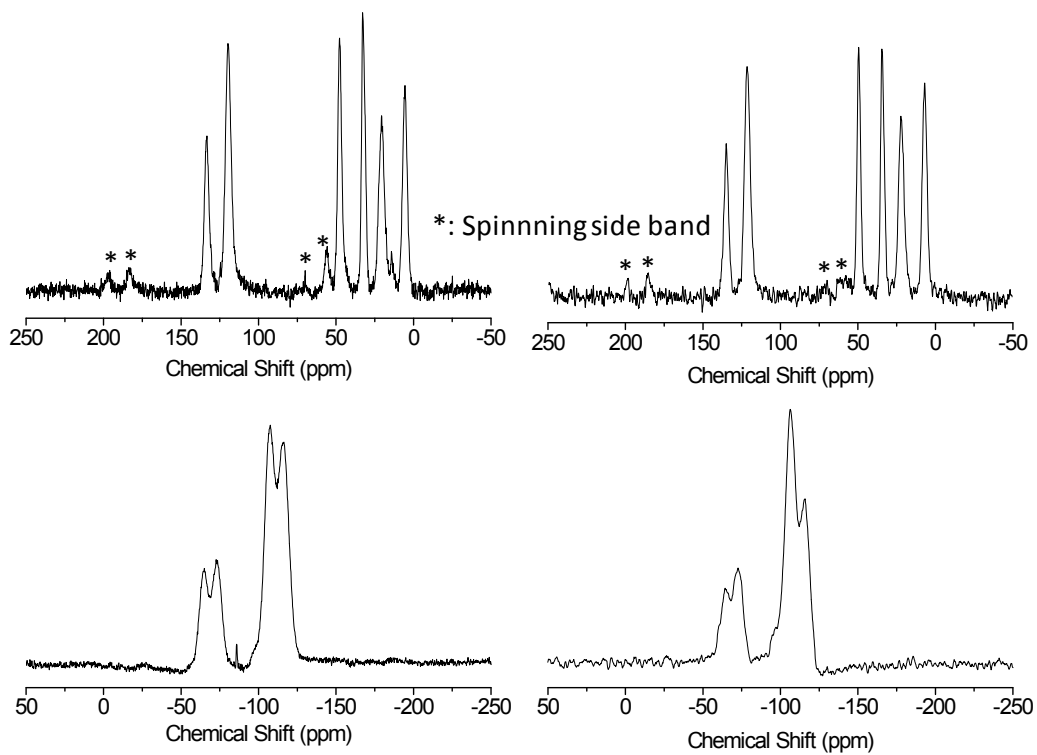

**S4**  $^{13}\text{C}$ -CPMAS-NMR of XS-MCM-41-Imi (up-left) and XS-Zn-Imi (up-right) and  $^{29}\text{Si}$ -CPMAS-NMR of XS-MCM-41-Imi (down-left) and XS-Zn-Imi (down-right)

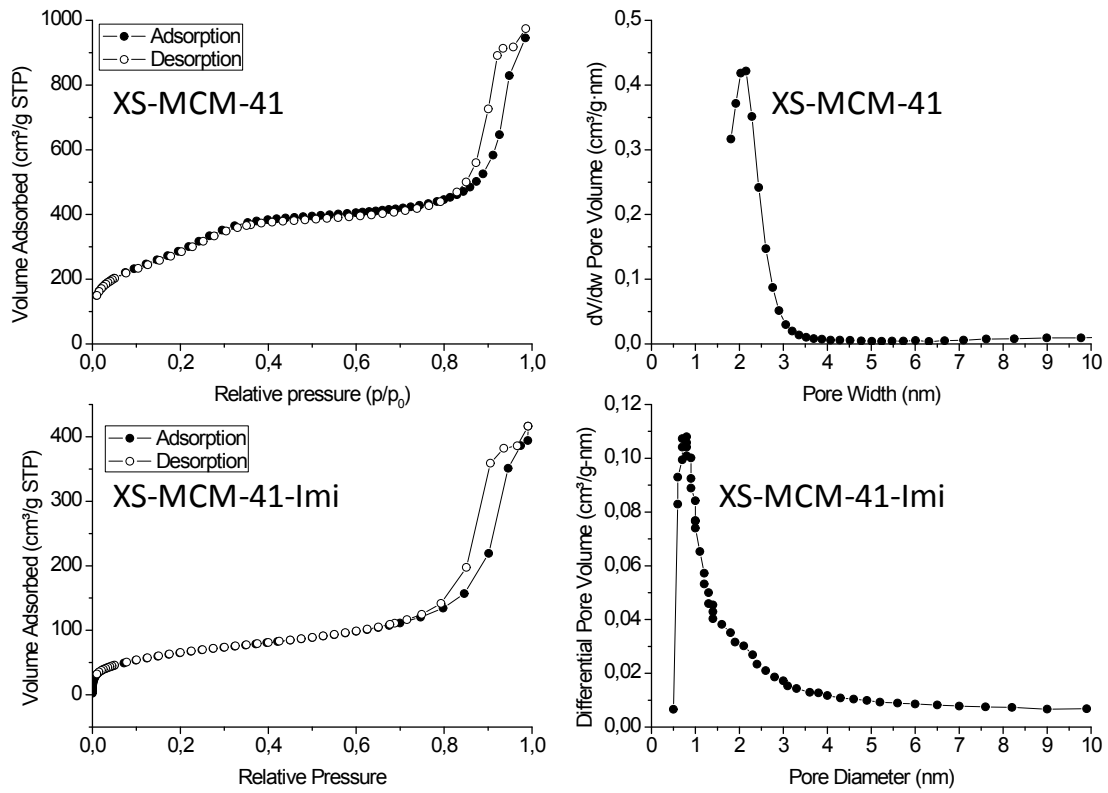

**S5** N<sub>2</sub> adsorption-desorption isotherm of XS-MCM-41 (up-left) and XS-MCM-41-Imi (down-left) and pore size distribution determined via BJH method of XS-MCM-41 (up-right) plus pore size distribution determined via HK method of XS-MCM-41-Imi (down-right)
